# Supplementary material for: Immune Reactivity of a 20-mer Peptide Representing the Zika E Glycan Loop Involves the Antigenic Determinants E-152/156/158
Source: PubMed Central journal article supplement (PMC7694461; doi:10.3390/v12111258), 2020-11-05
Supplement: viruses-12-01258-s001.pdf [file viruses-12-01258-s001.pdf]

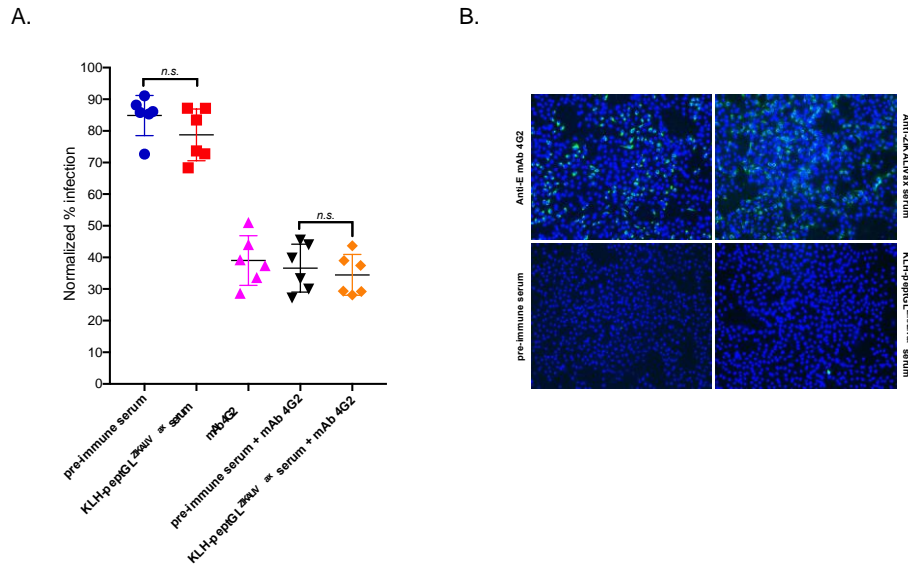

**Figure S1.** Reactivity of mouse KLH-peptGL<sup>ZIKALIVax</sup> immune serum with ZIKV E protein. In (A), flow cytometry neutralization (FNT) assay on mutant ZIKV<sup>GFP</sup> was performed. ZIKV<sup>GFP</sup> sample was mixed with an equal volume of pre-immune or anti-peptGL<sup>ZIKALIVax</sup> immune serum RE at dilutions of 1:200 or purified anti-E mAb 4G2 or a mix of mAb 4G2 and mouse immune serum. The percentage of GFP-positive cells was determined by flow cytometry analysis. The results were expressed as the percentage of GFP-positive cells in assay relative to that calculated in absence of serum; n.s.:  $p > 0.05$ . In (B), Vero cells were infected 24 h with ZIKV strain MR766 at multiplicity of infection of 1 and then fixed with a mix of methanol/acetone at cold temperature. Mouse immune serum (dilution 1:200) and anti-E mAb 4G2 were used as primary antibody and Alexa 488-conjugated anti-mouse IgG antibody as secondary antibody. The nucleus was stained with DAPI (blue). Immunostained cells were visualized with a fluorescent microscope. The same magnification of x 20 was used throughout.

A.

```

MVLLLLSVLLLKEDVRGSAQSTGL IRCIGVSNRDFVEGMSGGTWVDVVLEHGGCVTVMAQD rEDIZIKALIVax
-----
KPTVDIELVTTTVSNPENLEYRIMLSVH GSQHSGMTVNDIGYETDENRAKVEITPNSPRAEA rEDIZIKALIVax
----- I---T-H----- rEDIZIKALIVax-(I152, T156, H158)

TLGGFGSLGLDCEPRAKGRLSSGHLKCRLKMgggsgggdykdddkggsgggghhhhhh rEDIZIKALIVax
----- rEDIZIKALIVax-(I152, T156, H158)

```

B.

| Predicted peptides: |       |     |                                   |        |  | Predicted peptides: |       |     |                                      |        |  |
|---------------------|-------|-----|-----------------------------------|--------|--|---------------------|-------|-----|--------------------------------------|--------|--|
| No.                 | Start | End | Peptide                           | Length |  | No.                 | Start | End | Peptide                              | Length |  |
| 1                   | 21    | 28  | QSTGLIRC                          | 8      |  | 1                   | 24    | 28  | GLIRC                                | 5      |  |
| 2                   | 36    | 38  | FVE                               | 3      |  | 2                   | 36    | 37  | FV                                   | 2      |  |
| 3                   | 75    | 80  | VSNPEN                            | 6      |  | 3                   | 73    | 80  | TTVSNPEN                             | 8      |  |
| 4                   | 91    | 110 | GSQHS <del>G</del> MIVNDTGHETDENR | 20     |  | 4                   | 90    | 111 | HGSQHS <del>G</del> GMTVNDIGYETDENRA | 22     |  |
| 5                   | 119   | 130 | SPRAEATLGGFG                      | 12     |  | 5                   | 118   | 131 | NSPRAEATLGGFGS                       | 14     |  |
| 6                   | 138   | 149 | PRAKGR <del>L</del> SSGHL         | 12     |  | 6                   | 138   | 146 | PRAKGR <del>L</del> SS               | 9      |  |
| 7                   | 155   | 181 | MGGSGGGDYKDDDDKGGSGGGHHHH         | 27     |  | 7                   | 155   | 181 | MGGSGGGDYKDDDDKGGSGGGHHHH            | 27     |  |

*rEDI*<sup>ZIKALIVax</sup>

*rEDI*<sup>ZIKALIVax</sup>-(I152, T156, H158)

(Bepipred Linear Epitope Prediction 2.0)

**Figure S2.** Prediction of rEDI antibody epitopes in ZIKALIVax. In (A), alignment of rEDI<sup>ZIKALIVax</sup> and its mutant rEDI-(T152, I156, Y158) of 181 amino acids. The glycan loop region is underlined. The mutant rEDI-(T152, I156, Y158) corresponds to the authentic sequence of ZIKV strain BeH819015. The signal peptide is indicated in italic. The two C-terminal FLAG and 6 × (His) tags and spacers are indicated in small letters. In (B), list of predicted linear B-cell epitopes based on antibody epitope predictor Bepipred Linear Epitope Prediction 2.0 (IEDB Analysis Resource, [www.http://tools.iedb.org/bcell/](http://tools.iedb.org/bcell/)). The glycan loop region was identified as predicted peptide n°4. The two tag epitopes in tandem at the C-terminus of rEDI were identified as predicted peptide n°7.

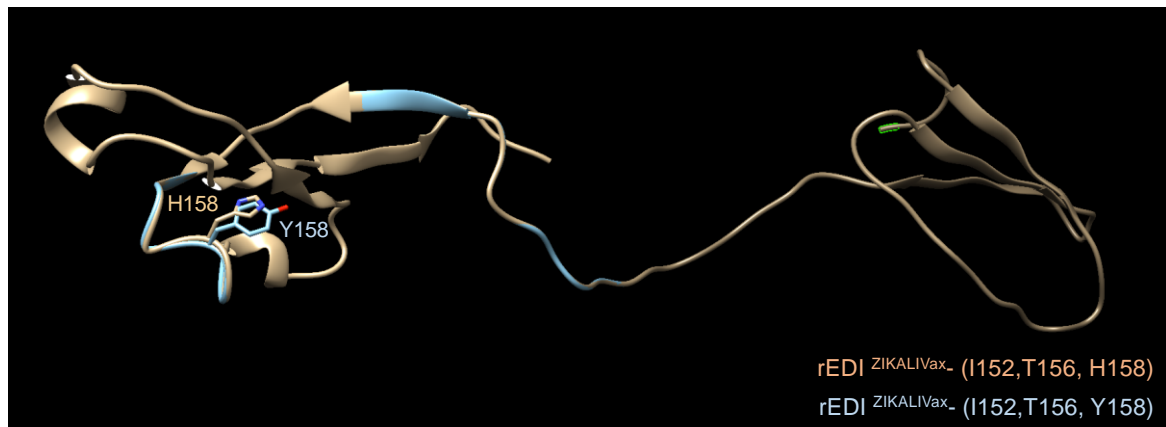

**Figure S3.** Location of residue E-158 on the 3D structure of glycosylated rEDI. Tridimensional structure prediction of ZIKALIVax EDI sequences bearing the residues I152, T156, and H158 or Y158 by comparative modeling on PHYRE<sup>2</sup> protein recognition server. The predicted structures were analyzed with Chimera.
